# Supplementary material
Source: Frontiers journal article supplement (https://www.frontiersin.org/articles/334242)
Supplement: Image_1.PDF [file Image_1.PDF]

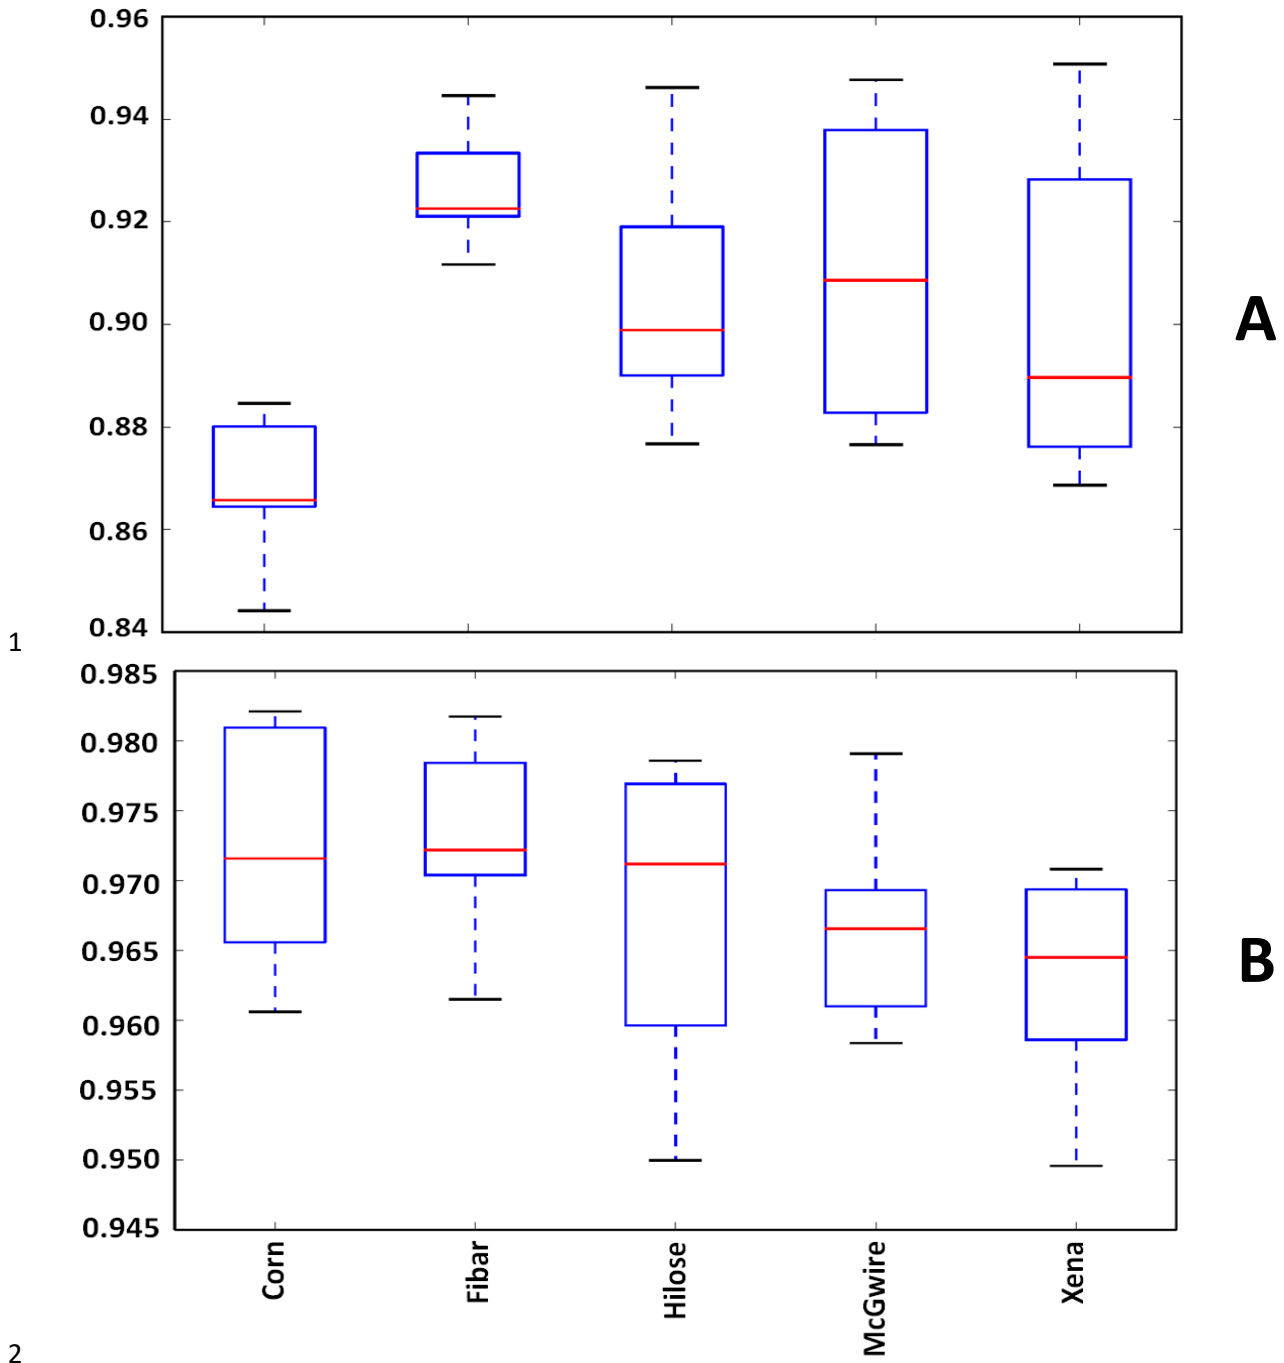

**Supplementary Figure 1.** Alpha diversity measures of Good's coverage diversity index associated with biofilms on the surface of corn (n=6) and barley (Fibar, Hilose, McGwire and Xena) (n=6) incubated the rumen of heifers fed a low (A) or high grain (B) diet.
